# Supplementary material
Source: publisher figshare collection journal article supplement (https://frontiersin.figshare.com/ndownloader/files/13594973)
Supplement: Supplementary file [file 13594973]

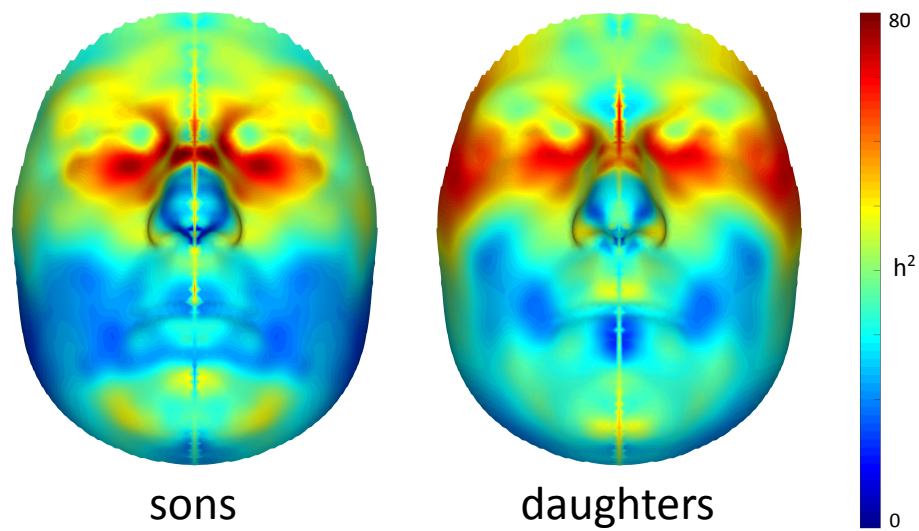

**Supplementary Figure 6. Facial heritability maps in the x-dimension.** Landmark (x-coordinate) heritability (%) for sons and daughters as obtained from the regression on fathers. The red-blue spectrum represents regions of high and low heritability, respectively. The maximum value was set to 80% for visualization purposes. The artifact at the midline is introduced by the alignment of the faces at  $x = 0$  during GPA. Variation in this region is close to zero, resulting in a bias of the heritability estimates.
